# Supplementary figures and images for: Clinical and Diagnostic Features of Post-Acute COVID-19 Vaccination Syndrome (PACVS)
Source: Preprints.org preprint supplement (doi:10.20944/preprints202406.0848.v1), 2024-06-12

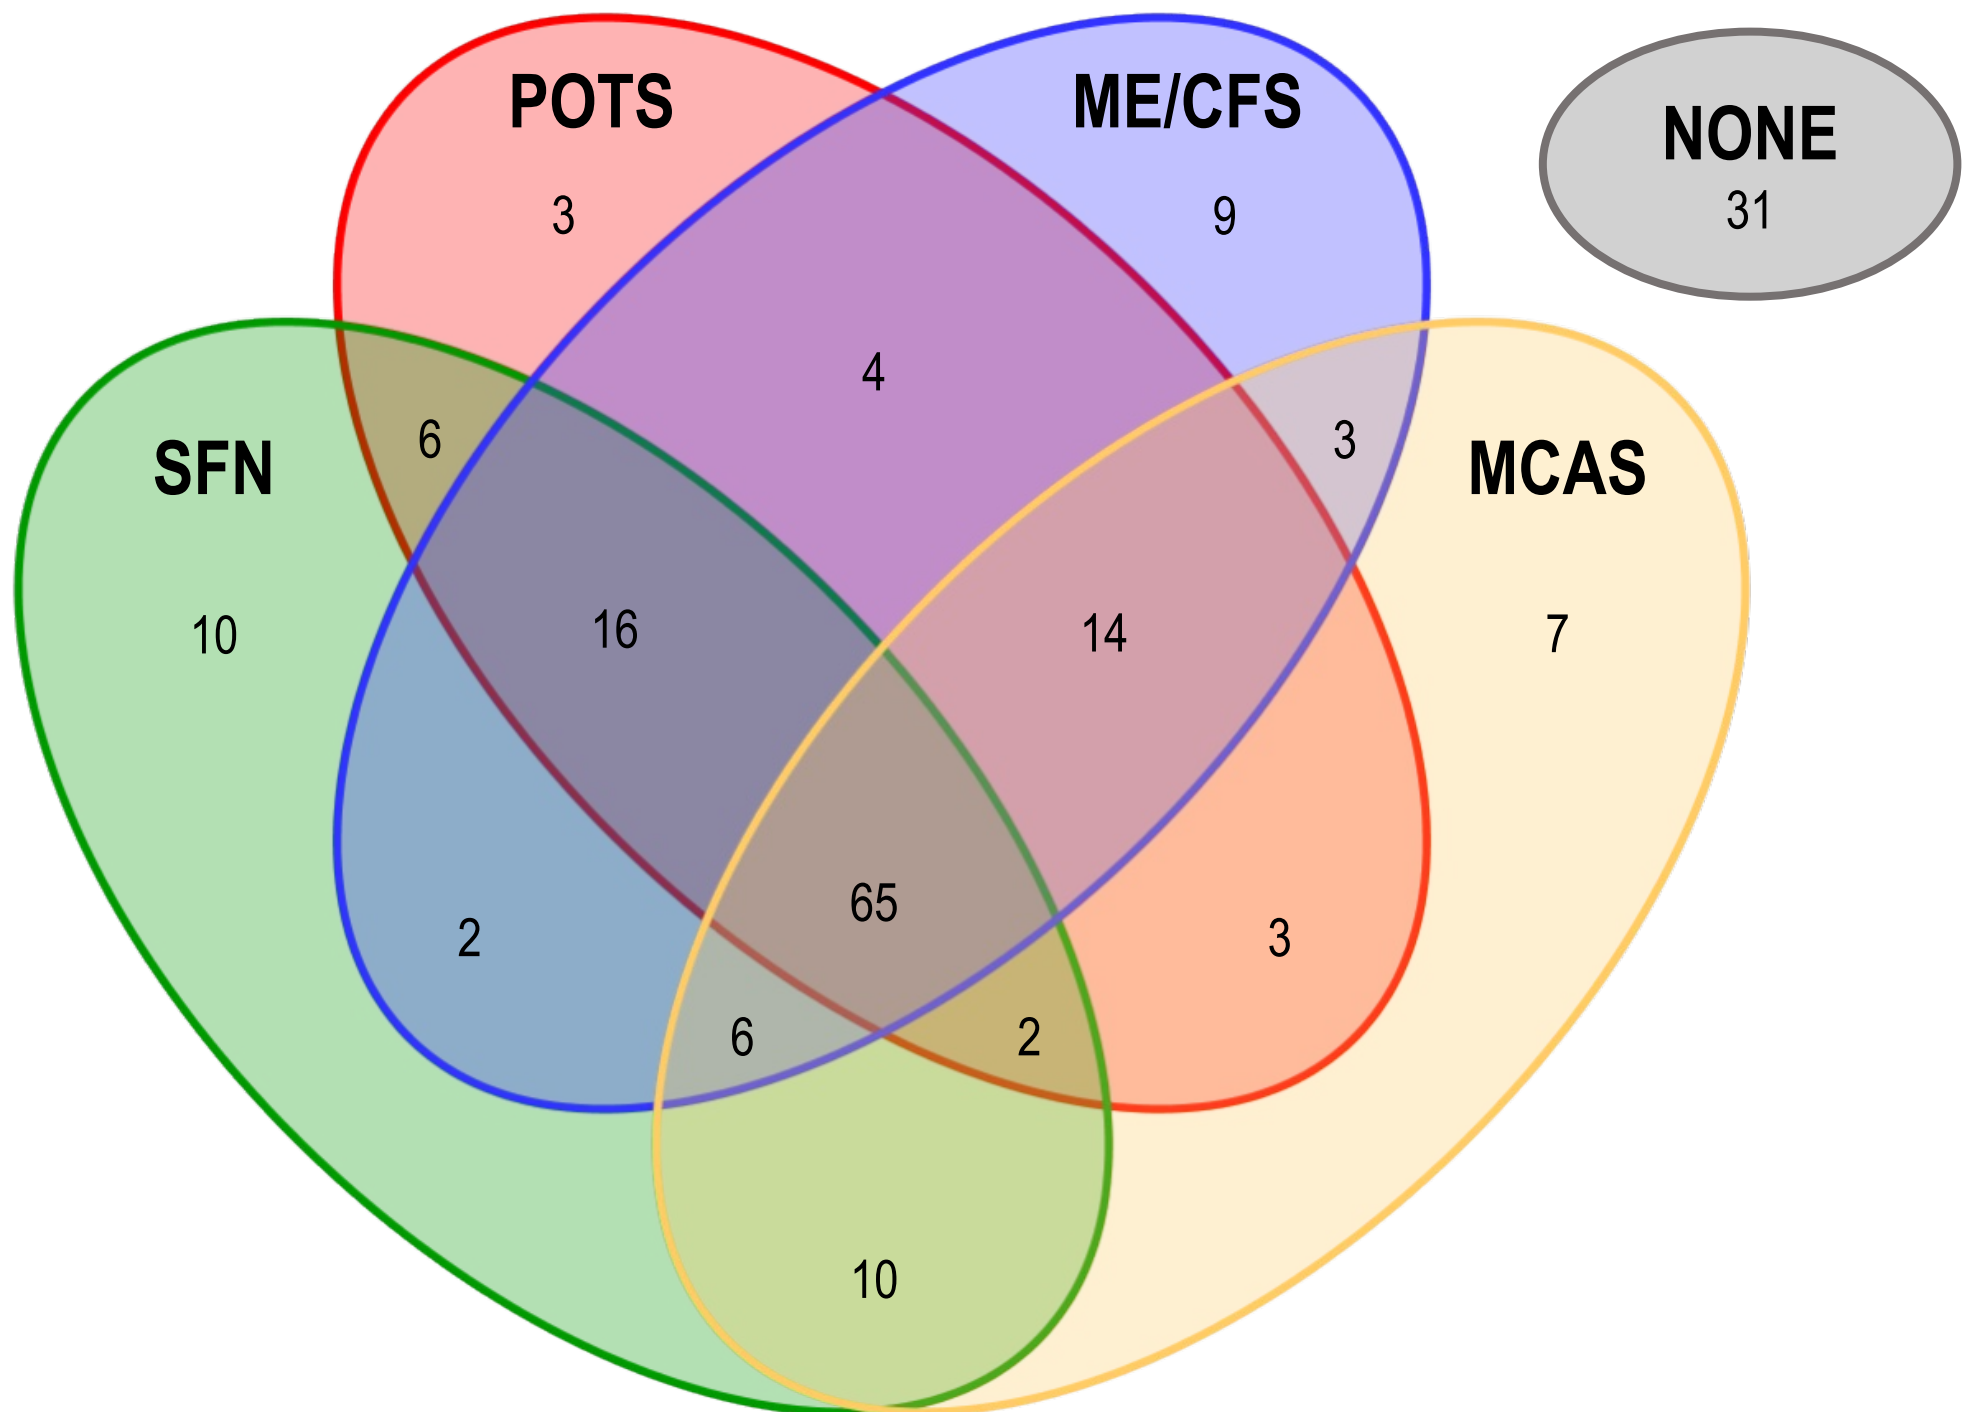

Supplement: Supplementary file 3 [file supplementary]

Color Key  
and Histogram

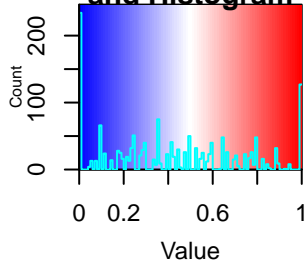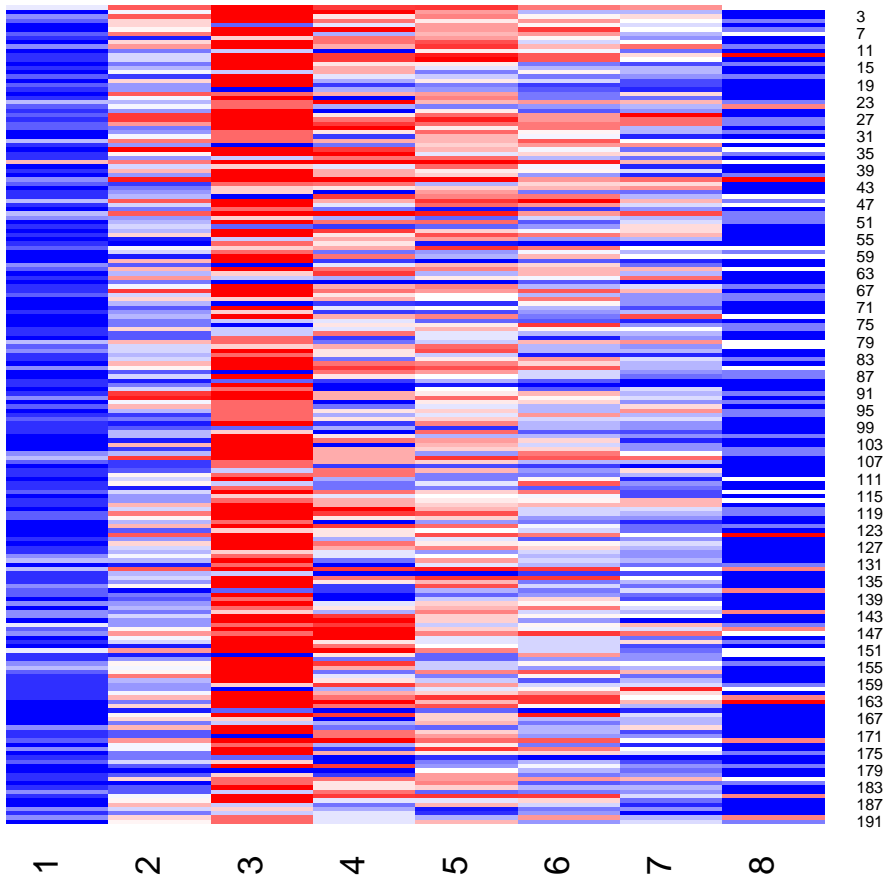

Supplement: Supplementary file 4 [file supplementary]

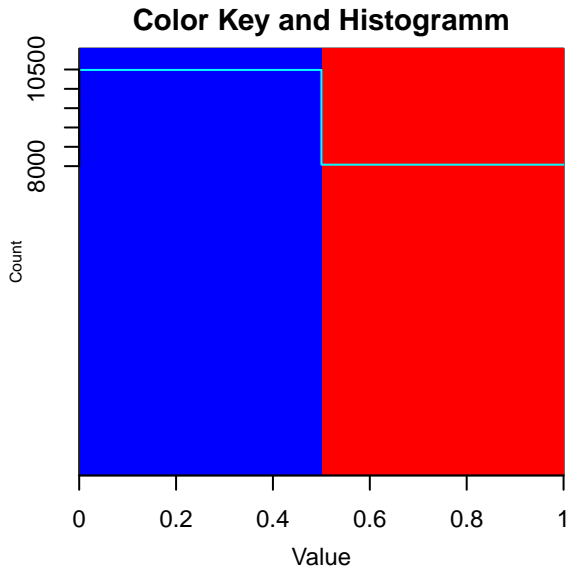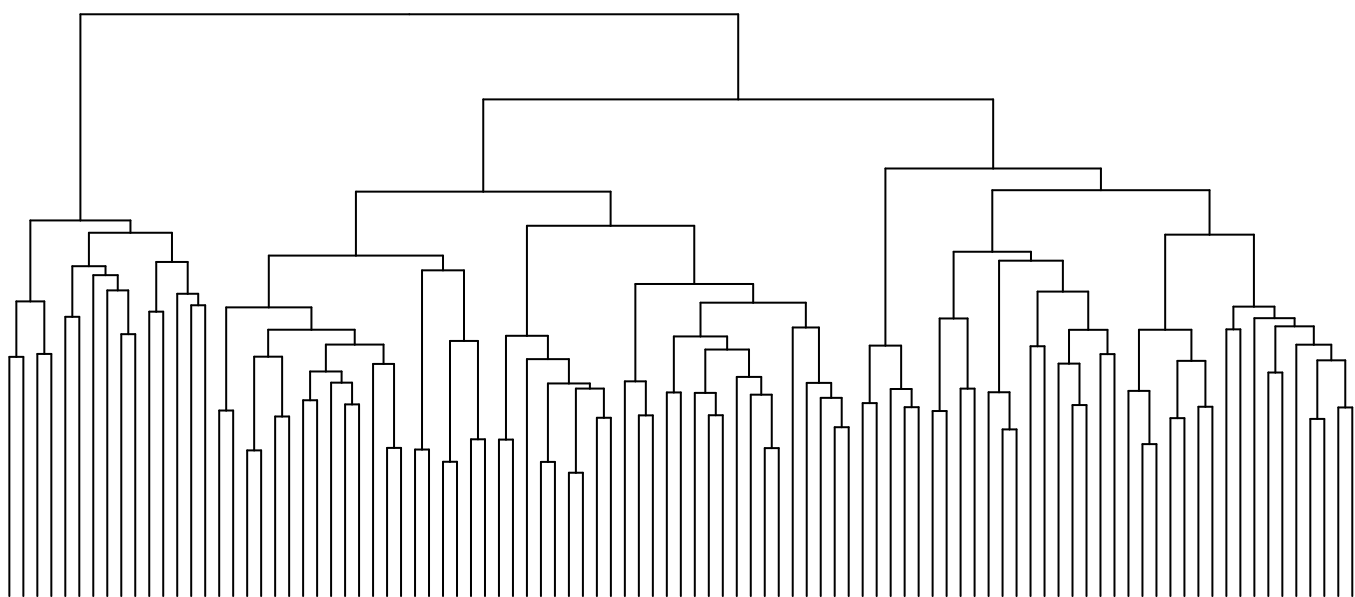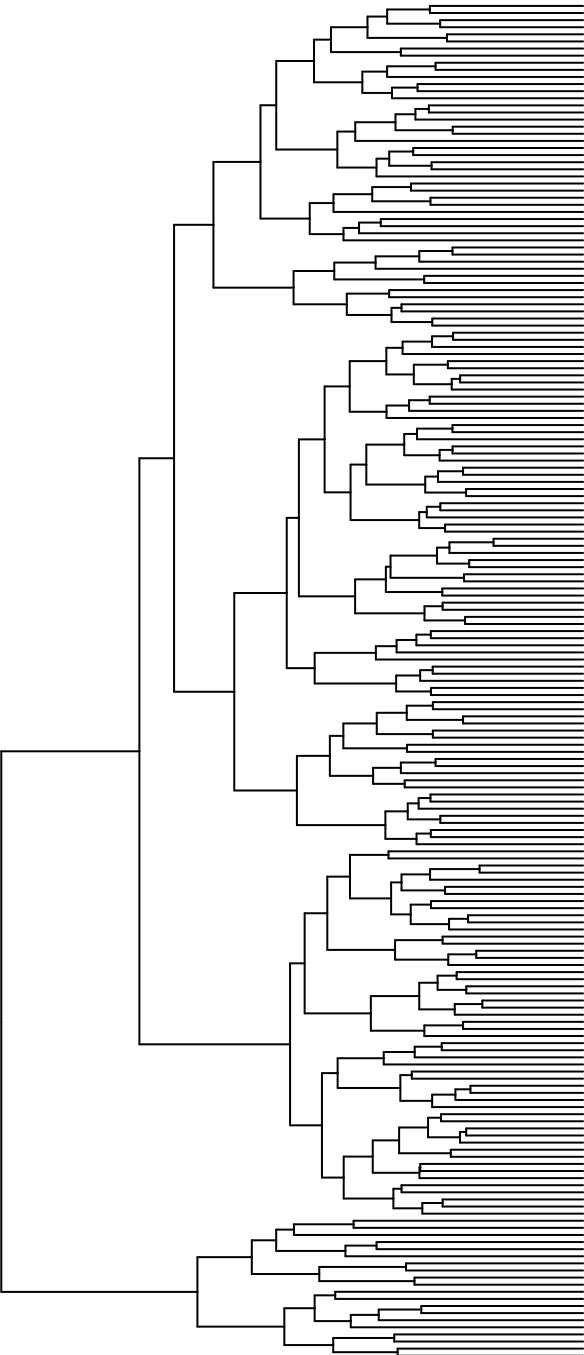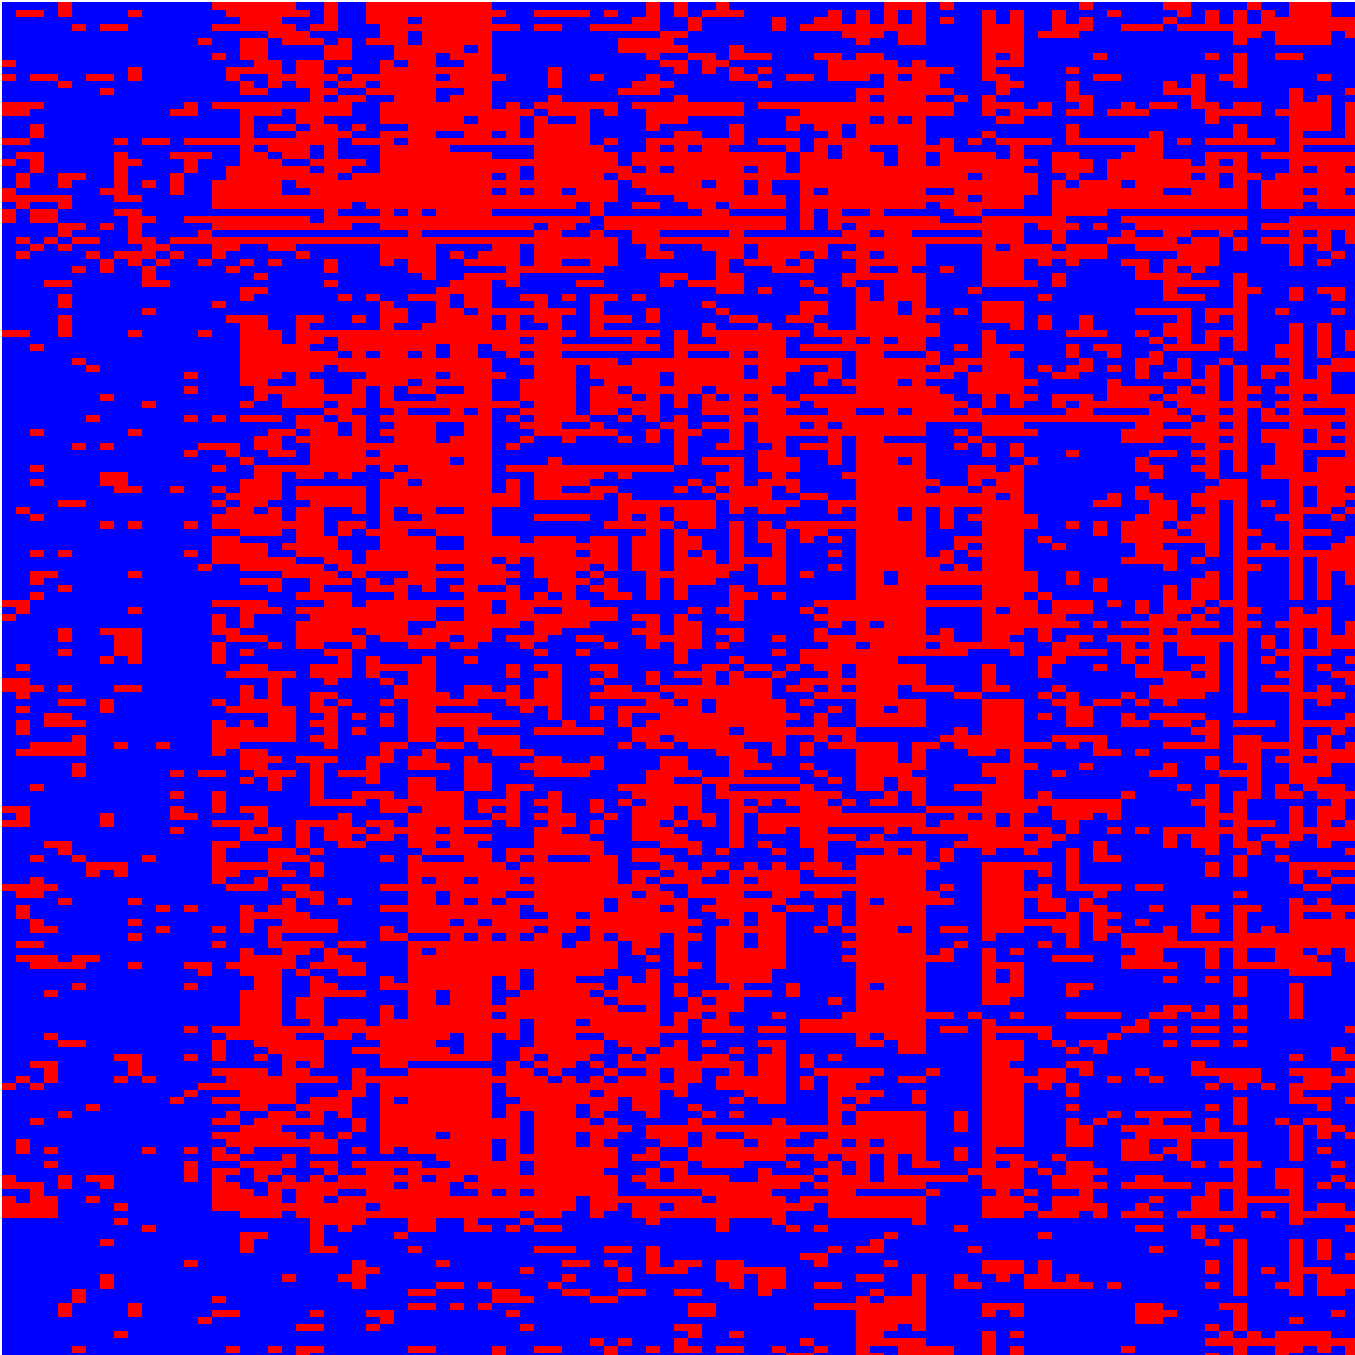

|     |  |
|-----|--|
| 100 |  |
| 140 |  |
| 90  |  |
| 44  |  |
| 179 |  |
| 98  |  |
| 11  |  |
| 13  |  |
| 25  |  |
| 182 |  |
| 32  |  |
| 162 |  |
| 62  |  |
| 40  |  |
| 1   |  |
| 14  |  |
| 23  |  |
| 28  |  |
| 46  |  |
| 10  |  |
| 21  |  |
| 2   |  |
| 137 |  |
| 132 |  |
| 18  |  |
| 168 |  |
| 37  |  |
| 15  |  |
| 145 |  |
| 50  |  |
| 182 |  |
| 113 |  |
| 11  |  |
| 128 |  |
| 35  |  |
| 168 |  |
| 134 |  |
| 54  |  |
| 18  |  |
| 141 |  |
| 11  |  |
| 117 |  |
| 67  |  |
| 186 |  |
| 28  |  |
| 91  |  |
| 186 |  |
| 22  |  |
| 120 |  |
| 31  |  |
| 61  |  |
| 8   |  |
| 9   |  |
| 155 |  |
| 119 |  |
| 164 |  |
| 17  |  |
| 116 |  |
| 103 |  |
| 126 |  |
| 151 |  |
| 108 |  |
| 218 |  |
| 78  |  |
| 130 |  |
| 3   |  |
| 169 |  |
| 11  |  |
| 18  |  |
| 69  |  |
| 83  |  |
| 94  |  |
| 33  |  |
| 3   |  |
| 175 |  |
| 140 |  |
| 132 |  |
| 139 |  |
| 56  |  |
| 163 |  |
| 112 |  |
| 4   |  |
| 175 |  |
| 38  |  |
| 148 |  |
| 157 |  |
| 170 |  |
| 107 |  |
| 104 |  |
| 121 |  |
| 163 |  |
| 144 |  |
| 53  |  |
| 182 |  |
| 95  |  |
| 61  |  |
| 57  |  |
| 45  |  |
| 36  |  |
| 30  |  |
| 159 |  |
| 125 |  |
| 23  |  |
| 172 |  |
| 146 |  |
| 12  |  |
| 86  |  |
| 68  |  |
| 270 |  |
| 94  |  |
| 79  |  |
| 60  |  |
| 72  |  |
| 52  |  |
| 189 |  |
| 56  |  |
| 108 |  |
| 80  |  |
| 120 |  |
| 60  |  |

Supplement: Supplementary file 5 [file supplementary]
